# Supplementary material for: Untargeted Metabolomics for Integrative Taxonomy: Metabolomics, DNA Marker-Based Sequencing, and Phenotype Bioimaging
Source: MDPI journal article supplement (doi:10.3390/plants12040881), 2023-02-15
Supplement: s1 [file s1]

## Supplementary Materials

**Table S1.** 71 chemophenetic marker molecules selected by PLS-DA characterizing the investigated *Riccia* species. Columns include the internal identifier used by the XCMS peak detection software, the mass-to-charge ratio of the precursor ion (m/z), retention time (RT) (s), compound name, the most specific compound class, the SMILES, and the level of annotation confidence (MSI level) according to [37].

| XCMS name  | Precursor Mass (Da) | Retention Time (s) | Compound Name       | Compound Class          | SMILES                                   | MSI level |
|------------|---------------------|--------------------|---------------------|-------------------------|------------------------------------------|-----------|
| FT0009_neg | 44,998              | 920,251            | -                   | -                       | -                                        | -         |
| FT0016_neg | 59,014              | 304,491            | -                   | -                       | -                                        | -         |
| FT0056_neg | 112,986             | 514,019            | -                   | -                       | -                                        | -         |
| FT0059_neg | 113,025             | 420,632            | -                   | -                       | -                                        | -         |
| FT0066_neg | 116,929             | 305,891            | -                   | -                       | -                                        | -         |
| FT0067_neg | 116,929             | 279,664            | -                   | -                       | -                                        | -         |
| FT0177_neg | 165,019             | 343,250            | -                   | -                       | -                                        | -         |
| FT0191_neg | 173,009             | 210,976            | -                   | -                       | -                                        | -         |
| FT0205_neg | 175,025             | 374,208            | -                   | -                       | -                                        | -         |
| FT0340_neg | 219,103             | 386,633            | -                   | -                       | -                                        | -         |
| FT0478_neg | 257,073             | 301,674            | -                   | Peptides                | -                                        | 3         |
| FT0483_neg | 257,894             | 94,183             | -                   | Polyhalopyridines       | -                                        | 3         |
| FT0539_neg | 271,061             | 343,250            | -                   | Indoles and derivatives | -                                        | 3         |
| FT0624_neg | 285,031             | 514,019            | -                   | -                       | -                                        | -         |
| FT0705_neg | 297,040             | 514,019            | -                   | O-methylated flavonoids | -                                        | 3         |
| FT0709_neg | 297,124             | 302,779            | -                   | -                       | -                                        | -         |
| FT0719_neg | 299,052             | 514,019            | -                   | -                       | -                                        | -         |
| FT0720_neg | 299,056             | 478,661            | Dinatin             | O-methylated flavonoids | <chem>COC1=C(C2=C(C=C1O)OC(=CC2=</chem>  | 3         |
| FT0721_neg | 299,056             | 374,273            | -                   | -                       | -                                        | -         |
| FT0723_neg | 299,150             | 258,724            | -                   | -                       | -                                        | -         |
| FT0737_pos | 219,211             | 786,065            | -                   | Prenol lipids           | -                                        | 3         |
| FT0765_neg | 303,160             | 281,317            | -                   | Unsaturated fatty acids | -                                        | 3         |
| FT0810_neg | 313,072             | 420,650            | -                   | -                       | -                                        | -         |
| FT0832_neg | 315,077             | 514,019            | -                   | Dipeptides              | -                                        | 3         |
| FT0833_neg | 315,077             | 420,632            | -                   | Dipeptides              | -                                        | 3         |
| FT0834_neg | 315,087             | 300,338            | -                   | Aryl chlorides          | -                                        | 3         |
| FT0839_neg | 315,098             | 238,775            | -                   | Phenol ethers           | -                                        | 3         |
| FT0902_neg | 323,186             | 470,279            | -                   | Methyl-branched fatty   | -                                        | 3         |
| FT0911_neg | 325,202             | 464,049            | -                   | -                       | -                                        | -         |
| FT0991_neg | 335,186             | 565,247            | -                   | Amino acids and         | -                                        | 3         |
| FT1113_neg | 355,088             | 246,652            | -                   | Benzene and substituted | -                                        | 3         |
| FT1116_neg | 355,088             | 46,998             | -                   | Benzene and substituted | -                                        | 3         |
| FT1330_pos | 273,076             | 270,530            | Thunberginol G      | Indanes                 | <chem>C1C(OC(=O)C2=C1C=CC=C2O)C3</chem>  | 2         |
| FT1331_pos | 273,066             | 440,548            | -                   | 1-hydroxy-2-            | -                                        | 3         |
| FT1333_pos | 273,076             | 249,296            | -                   | 1-hydroxy-2-            | -                                        | 3         |
| FT1337_pos | 273,076             | 303,271            | 4,8-Dihydroxy-3-(4- | Indanes                 | <chem>C1=CC2=C(C(=C1)O)C(=O)OC(C2</chem> | 2         |
| FT1463_neg | 403,115             | 333,042            | -                   | -                       | -                                        | -         |
| FT1492_neg | 409,183             | 369,567            | -                   | Amino acids and         | -                                        | 3         |
| FT1610_neg | 425,210             | 412,939            | -                   | -                       | -                                        | -         |
| FT1633_neg | 428,070             | 409,931            | -                   | -                       | -                                        | -         |
| FT1670_neg | 435,129             | 313,025            | -                   | Hexoses                 | -                                        | 3         |
| FT1723_pos | 300,061             | 372,497            | -                   | Pentoses                | -                                        | 3         |
| FT1725_pos | 300,059             | 440,800            | -                   | Pentoses                | -                                        | 3         |
| FT1726_pos | 300,062             | 514,188            | -                   | Pentoses                | -                                        | 3         |
| FT1765_pos | 303,086             | 319,526            | -                   | Naphthopyranones        | -                                        | 3         |

|            |          |         |                        |                          |                             |   |
|------------|----------|---------|------------------------|--------------------------|-----------------------------|---|
| FT1849_neg | 462,099  | 188,035 | 8-[[2-(3,4-            | Benzenesulfonamides      | CC1=C(N=C(O1)C2=CC(=C(C=C2) | 2 |
| FT1877_neg | 465,104  | 352,245 | -                      | -                        | -                           | - |
| FT2010_neg | 489,104  | 421,157 | Pectolinarigenin       | 7- Flavonoid-7-O-        | COC1=CC=C(C=C1)C2=CC(=O)C3  | 2 |
| FT2026_neg | 491,109  | 420,650 | -                      | N-acyl-alpha amino acids | -                           | 3 |
| FT2126_neg | 509,070  | 409,931 | -                      | -                        | -                           | - |
| FT2201_neg | 521,130  | 258,737 | -                      | -                        | -                           | - |
| FT2210_pos | 333,204  | 582,982 | -                      | Amino acids and          | -                           | 3 |
| FT2267_neg | 535,045  | 369,196 | -                      | Aryl ketones             | -                           | 3 |
| FT2269_neg | 535,125  | 464,032 | -                      | Glycosyl compounds       | -                           | 3 |
| FT2397_neg | 558,044  | 283,986 | -                      | -                        | -                           | - |
| FT2409_pos | 345,167  | 537,094 | -                      | Alpha amino acids        | -                           | 3 |
| FT2410_pos | 345,167  | 539,776 | -                      | Amino acids and          | -                           | 3 |
| FT2427_neg | 562,041  | 276,273 | -                      | Diphenylethers           | -                           | 3 |
| FT2498_neg | 577,072  | 426,196 | -                      | -                        | -                           | - |
| FT2867_pos | 380,182  | 163,014 | L-threonyl-L-prolyl-L- | Oligopeptides            | CC(C(C(=O)N1CCCC1C(=O)NC(C  | 2 |
| FT3032_neg | 681,226  | 188,099 | -                      | N-acyl-alpha amino acids | -                           | 3 |
| FT3311_neg | 775,215  | 685,094 | -                      | -                        | -                           | - |
| FT3617_neg | 1071,289 | 76,277  | -                      | -                        | -                           | - |
| FT3633_neg | 1113,300 | 194,636 | -                      | -                        | -                           | - |
| FT3719_pos | 487,100  | 306,172 | -                      | Phenolic glycosides      | -                           | 3 |
| FT4852_pos | 623,124  | 303,292 | -                      | Peptides                 | -                           | 3 |
| FT4854_pos | 623,116  | 435,697 | -                      | Alpha amino acids and    | -                           | 3 |
| FT5131_pos | 649,443  | 942,538 | -                      | Carbamate esters         | -                           | 3 |
| FT5147_pos | 650,447  | 942,538 | -                      | Hydroxysteroids          | -                           | 3 |
| FT5242_pos | 661,414  | 811,314 | -                      | Sesquiterpenoids         | -                           | 3 |
| FT5243_pos | 661,405  | 822,266 | -                      | Alpha amino acids and    | -                           | 3 |

**Table S2.** Compounds of interest. Table containing known compounds that were previously described in literature to be characteristic for *Riccia* species.

| XCMS name  | Compound name              | Precursor Mass (Da) | Polarity | RT (s) | CSI:Fin gerID Score | SMILES                                                                 |
|------------|----------------------------|---------------------|----------|--------|---------------------|------------------------------------------------------------------------|
| FT0782_neg | Eriodictiol                | 287,06              | negative | 279,6  | -50,24              | C1C(OC2=CC(=CC(=C2C1=O)O)O)C3=CC(=C(C=C3)O)O                           |
| FT0782_neg | Steppogenin                | 287,06              | negative | 279,6  | -82,522             | C1C(OC2=CC(=CC(=C2C1=O)O)O)C3=C(C=C(C=C3)O)O                           |
| FT0789_neg | Eriodictiol                | 287,06              | negative | 240,6  | -50,24              | C1C(OC2=CC(=CC(=C2C1=O)O)O)C3=CC(=C(C=C3)O)O                           |
| FT0789_neg | Steppogenin                | 287,06              | negative | 240,6  | -82,522             | C1C(OC2=CC(=CC(=C2C1=O)O)O)C3=C(C=C(C=C3)O)O                           |
| FT2108_neg | Naringenin-7-O-glucuronide | 447,09              | negative | 362,4  | -120,299            | C1C(OC2=CC(=CC(=C2C1=O)O)OC3C(C(C(C(O3)C(=O)O)O)O)O)C4=CC=C(C=C4)O     |
| FT2236_neg | Luteolin 7-o-glucuronide   | 461,07              | negative | 332,4  | -80,933             | C1=CC(=C(C=C1C2=CC(=O)C3=C(C=C(C=C3O2)OC4C(C(C(C(O4)C(=O)O)O)O)O)O)O)O |
| FT2239_neg | Luteolin 7-o-glucuronide   | 461,07              | negative | 279,6  | -80,933             | C1=CC(=C(C=C1C2=CC(=O)C3=C(C=C(C=C3O2)OC4C(C(C(C(O4)C(=O)O)O)O)O)O)O)O |
| FT2240_neg | Luteolin 7-o-glucuronide   | 461,07              | negative | 349,2  | -80,933             | C1=CC(=C(C=C1C2=CC(=O)C3=C(C=C(C=C3O2)OC4C(C(C(C(O4)C(=O)O)O)O)O)O)O)O |

**Table S3.** Chemophenetic biomarker molecules selected by PLS-DA representative of each of the investigated *Riccia* species. Columns include the internal identifier used by the XCMS peak detection software, the mass-to-charge ratio of the precursor ion (m/z), retention time (RT) (s), compound name, the most specific compound class, the SMILES, and the level of annotation confidence (MSI level) according to [37].

| XCMS name  | Precursor mass (Da) | Retention time (s) | Compound Name | Compound Class | SMILES | MSI level |
|------------|---------------------|--------------------|---------------|----------------|--------|-----------|
| FT0021_neg | 61,988              | 626,524            | -             | -              | -      | -         |
| FT0023_neg | 61,988              | 582,661            | -             | -              | -      | -         |
| FT0024_neg | 61,988              | 279,884            | -             | -              | -      | -         |

|            |         |         |                          |                             |                             |   |
|------------|---------|---------|--------------------------|-----------------------------|-----------------------------|---|
| FT0068_neg | 112,986 | 626,524 | -                        | -                           | -                           | - |
| FT0071_neg | 112,986 | 600,723 | -                        | -                           | -                           | - |
| FT0072_neg | 112,986 | 582,661 | -                        | -                           | -                           | - |
| FT0087_neg | 116,928 | 499,702 | -                        | -                           | -                           | - |
| FT0088_neg | 116,929 | 582,593 | -                        | -                           | -                           | - |
| FT0089_neg | 116,929 | 626,524 | -                        | -                           | -                           | - |
| FT0245_neg | 175,025 | 216,383 | -                        | -                           | -                           | - |
| FT0388_neg | 219,102 | 578,388 | -                        | -                           | -                           | - |
| FT0430_neg | 231,066 | 356,802 | 6-acetyl-7-hydroxy-2,3-  | Benzopyrans                 | c12c(cc(c(c2)C(=O)C)O)oc(c( | 2 |
| FT0483_neg | 243,899 | 93,316  | -                        | -                           | -                           | - |
| FT0547_neg | 257,065 | 28,626  | -                        | Alpha amino acids           | -                           | 3 |
| FT0685_neg | 281,176 | 495,228 | -                        | Prostaglandins and related  | -                           | 3 |
| FT0686_neg | 281,176 | 526,396 | -                        | Prostaglandins and related  | -                           | 3 |
| FT0713_neg | 285,040 | 342,071 | Campherol                | 7-hydroxyflavonoids         | C1=CC(=CC=C1C2=C(C(=O)      | 2 |
| FT0814_neg | 299,077 | 216,359 | -                        | Phenolic glycosides         | -                           | 3 |
| FT0834_neg | 301,082 | 216,359 | -                        | Boronic acid derivatives    | -                           | 3 |
| FT0864_neg | 303,158 | 526,423 | -                        | Unsaturated fatty acids     | -                           | 3 |
| FT0879_neg | 305,176 | 533,415 | -                        | Dicarboxylic acids and      | -                           | 3 |
| FT0893_neg | 307,191 | 477,886 | -                        | Lineolic acids and          | -                           | 3 |
| FT1016_neg | 323,186 | 533,415 | -                        | Methyl-branched fatty acids | -                           | 3 |
| FT1038_pos | 237,091 | 557,967 | -                        | Amino acids                 | -                           | 3 |
| FT1039_pos | 237,095 | 71,863  | -                        | Alpha amino acids and       | -                           | 3 |
| FT1136_neg | 337,809 | 212,443 | -                        | Arylsulfonic acids and      | -                           | 3 |
| FT1174_neg | 343,067 | 216,359 | Vanillic acidglucuronide | Hydrolyzable tannins        | COC1=C(C(=CC(=C1)C(=O)O     | 2 |
| FT1284_neg | 357,083 | 233,912 | -                        | Aryl ketones                | -                           | 3 |
| FT1573_pos | 273,083 | 36,380  | -                        | Benzoic acids and           | -                           | 3 |
| FT1589_neg | 398,014 | 51,885  | -                        | Dichlorobenzenes            | -                           | 3 |
| FT1756_neg | 423,197 | 651,511 | -                        | Gamma-glutamyl peptides     | -                           | 3 |
| FT1812_neg | 427,182 | 626,524 | -                        | Iridoid O-glycosides        | -                           | 3 |
| FT1819_neg | 427,998 | 216,383 | -                        | Purine nucleotides          | -                           | 3 |
| FT1864_neg | 435,123 | 499,651 | -                        | Amino acids and derivatives | -                           | 3 |
| FT1870_neg | 436,127 | 499,651 | -                        | 2-halobenzoic acids and     | -                           | 3 |
| FT1875_neg | 437,139 | 600,723 | -                        | 2-arylbenzofuran flavonoids | -                           | 3 |
| FT1891_pos | 291,196 | 477,366 | -                        | Lineolic acids and          | -                           | 3 |
| FT1897_neg | 439,154 | 499,727 | -                        | O-glycosyl compounds        | -                           | 3 |
| FT1899_neg | 439,154 | 529,260 | -                        | O-glycosyl compounds        | -                           | 3 |
| FT1900_neg | 439,155 | 585,081 | -                        | O-glycosyl compounds        | -                           | 3 |
| FT1901_neg | 439,155 | 577,409 | -                        | O-glycosyl compounds        | -                           | 3 |
| FT1919_neg | 441,161 | 529,337 | -                        | Phenol ethers               | -                           | 3 |
| FT1945_neg | 443,177 | 582,593 | -                        | Alpha amino acids and       | -                           | 3 |
| FT1956_neg | 444,994 | 216,359 | -                        | Benzenesulfonic acids and   | -                           | 3 |
| FT1992_neg | 449,108 | 404,035 | -                        | Benzodioxoles               | -                           | 3 |
| FT2022_neg | 453,170 | 642,024 | -                        | Amino acids and derivatives | -                           | 3 |
| FT2030_pos | 300,066 | 477,366 | -                        | Cysteine and derivatives    | -                           | 3 |
| FT2035_neg | 454,174 | 642,024 | -                        | 3-oxosteroids               | -                           | 3 |
| FT2049_neg | 455,149 | 462,747 | -                        | Alpha amino acids and       | -                           | 3 |
| FT2050_neg | 455,176 | 642,024 | -                        | Amino acids and derivatives | -                           | 3 |
| FT2093_neg | 461,072 | 342,026 | Luteolin 7-glucuronide   | Flavonoid-7-O-glucuronides  | C1=CC(=C(C(=C1C2=CC(=O)     | 2 |
| FT2097_neg | 461,136 | 529,337 | -                        | Amino acids and derivatives | -                           | 3 |
| FT2099_neg | 461,152 | 626,524 | -                        | Alpha amino acids and       | -                           | 3 |
| FT2118_neg | 463,152 | 582,169 | -                        | Alpha amino acid amides     | -                           | 3 |
| FT2119_neg | 463,152 | 585,139 | -                        | Alpha amino acid amides     | -                           | 3 |
| FT2167_neg | 469,165 | 562,806 | -                        | Amino acids and derivatives | -                           | 3 |
| FT2182_neg | 471,173 | 499,702 | -                        | O-glycosyl compounds        | -                           | 3 |
| FT2236_neg | 479,147 | 499,727 | -                        | Alloxazines and             | -                           | 3 |

|            |         |         |                              |                             |                        |   |   |
|------------|---------|---------|------------------------------|-----------------------------|------------------------|---|---|
| FT2238_neg | 479,145 | 582,890 | -                            | Alloxazines                 | and                    | - | 3 |
| FT2296_neg | 487,176 | 577,400 | -                            | Alpha amino acids           | and                    | - | 3 |
| FT2321_neg | 491,146 | 499,727 | -                            | Glucuronides                |                        | - | 3 |
| FT2341_neg | 493,163 | 626,524 | -                            | Phenol ethers               |                        | - | 3 |
| FT2363_neg | 496,145 | 172,882 | -                            | Alpha amino acids           | and                    | - | 3 |
| FT2431_neg | 505,126 | 532,878 | -                            | Methoxybenzoic acids        | and                    | - | 3 |
| FT2460_neg | 511,080 | 499,727 | -                            | Phenol ethers               |                        | - | 3 |
| FT2482_neg | 515,081 | 499,727 | -                            | Amino acids and derivatives |                        | - | 3 |
| FT2488_neg | 515,145 | 626,524 | -                            | Terpene glycosides          |                        | - | 3 |
| FT2512_neg | 517,122 | 499,727 | -                            | Alpha amino acids           | and                    | - | 3 |
| FT2514_neg | 517,151 | 626,524 | -                            | Phenol ethers               |                        | - | 3 |
| FT2579_neg | 528,042 | 528,871 | -                            | Alkylglucosinolates         |                        | - | 3 |
| FT2584_pos | 333,203 | 539,926 | -                            | Amino acids and derivatives |                        | - | 3 |
| FT2591_pos | 333,203 | 558,853 | -                            | Amino acids and derivatives |                        | - | 3 |
| FT2796_neg | 559,210 | 614,055 | -                            | Triterpenoids               |                        | - | 3 |
| FT2818_neg | 562,004 | 536,291 | -                            | Purine ribonucleoside       |                        | - | 3 |
| FT2853_neg | 569,097 | 381,908 | -                            | Anthracenecarboxylic acids  |                        | - | 3 |
| FT2862_neg | 572,032 | 536,291 | -                            | Amino acids and derivatives |                        | - | 3 |
| FT3062_neg | 606,059 | 529,260 | -                            | Amino acids and derivatives |                        | - | 3 |
| FT3072_neg | 607,166 | 335,946 | -                            | Isoflavonoid O-glycosides   |                        | - | 3 |
| FT3073_neg | 607,130 | 356,802 | -                            | Flavonoid-3-O-glycosides    |                        | - | 3 |
| FT3088_neg | 609,172 | 335,946 | -                            | 1-acyl-sn-glycerol-3-       |                        | - | 3 |
| FT3148_neg | 621,145 | 345,997 | -                            | Flavonoid O-glycosides      |                        | - | 3 |
| FT3266_neg | 637,104 | 342,026 | Luteolin 7,3''-diglucuronide | Flavonoid-7-O-glucuronides  | C1=CC(=C(C=C1C2=CC(=O) | 2 |   |
| FT3348_neg | 651,111 | 279,884 | -                            | Alpha amino acids and       |                        | - | 3 |
| FT3350_neg | 651,119 | 626,648 | Luteolin 3'-methyl ether 7-  | Flavonoid-7-O-glucuronides  | COC1=C(C=CC(=C1)C2=CC( | 2 |   |
| FT3351_neg | 651,119 | 356,846 | Luteolin 3'-methyl ether 7-  | Flavonoid-7-O-glucuronides  | COC1=C(C=CC(=C1)C2=CC( | 2 |   |
| FT3363_neg | 653,116 | 279,884 | -                            | Flavonoid-3-O-glycosides    |                        | - | 3 |
| FT3389_neg | 659,086 | 342,026 | -                            | Flavonoid-7-O-glucuronides  |                        | - | 3 |
| FT3448_neg | 669,249 | 626,992 | -                            | Amino acids and derivatives |                        | - | 3 |
| FT3543_neg | 687,141 | 216,359 | -                            | Purine nucleotide sugars    |                        | - | 3 |
| FT3718_neg | 733,235 | 763,383 | -                            | Phenolic glycosides         |                        | - | 3 |
| FT3738_neg | 737,029 | 342,026 | -                            | (5'→5')-dinucleotides       |                        | - | 3 |
| FT3754_neg | 741,149 | 85,055  | -                            | Flavonoid-3-O-glycosides    |                        | - | 3 |
| FT3765_neg | 746,238 | 457,864 | -                            | Gamma-glutamyl peptides     |                        | - | 3 |
| FT3967_neg | 853,365 | 626,524 | -                            | Amino acids and derivatives |                        | - | 3 |
| FT4011_neg | 880,203 | 279,884 | -                            | Oligopeptides               |                        | - | 3 |
| FT4014_neg | 881,332 | 582,776 | -                            | Alkyl glycosides            |                        | - | 3 |
| FT4047_neg | 901,297 | 529,471 | -                            | Peptides                    |                        | - | 3 |
| FT6093_pos | 643,384 | 550,240 | -                            | Peptides                    |                        | - | 3 |
| FT6255_pos | 659,378 | 745,548 | -                            | Hydroxysteroids             |                        | - | 3 |

**Table S4.** List of samples and their identification codes for use with the different types of analyses.

|                         |              |                   |            |             |                      | Metabolomics sample ID | Sequencing     |
|-------------------------|--------------|-------------------|------------|-------------|----------------------|------------------------|----------------|
| Species                 | Collection   | Geographical Text | on voucher |             |                      |                        |                |
| name                    | Taxon ID     | Voucher ID        | date       | coordinates | sleeve               | positive mode          | negative mode  |
| <i>Riccia glauca</i>    | NCBI:129944, | JE04010991        | 2021-09-13 | 48.638275   | N,Aichtal,           | R-glauca-1-            | R-glauca-1-    |
| L.                      | GBIF:5286298 |                   |            | 9.2534083   | E,Grötzingen, Acker, | R-glauca-2-            | R-glauca-2-    |
|                         |              |                   |            |             |                      | R-glauca-3-            | R-glauca-3-    |
| <i>Riccia sorocarpa</i> | NCBI:122646, | JE04010990        | 2021-09-13 | 48.638275   | N,Aichtal,           | R-sorocarpa-1-         | R-sorocarpa-1- |
|                         | GBIF:5286296 |                   |            | 9.2534083   | E,Grötzingen, Acker, | R-sorocarpa-2-         | R-sorocarpa-2- |
|                         |              |                   |            |             |                      | R-sorocarpa-3-         | R-sorocarpa-3- |

---

|                      |              |            |            |           |                       |                       |                       |                       |
|----------------------|--------------|------------|------------|-----------|-----------------------|-----------------------|-----------------------|-----------------------|
| <i>Riccia</i>        | GBIF:5931123 | JE04010989 | 2021-09-13 | 48.638275 | N,Aichtal,            | R-wanstorffii-2-      | R-wanstorffii-2-      | Ri01                  |
| <i>wanstorffii</i>   |              |            |            | 9.2534083 | E,Grötzingen, Acker,  | R-wanstorffii-3-      | R-wanstorffii-3-      |                       |
|                      |              |            |            |           |                       | R-wanstorffii-4-      | R-wanstorffii-4-      |                       |
| <i>Lunularia</i>     | NCBI:56931,  | JE04010993 | 2021-12-08 | 51.494848 | N,IPB-Gelände, hinter | Lunularia-cruciata-1- | Lunularia-cruciata-1- | Ri05                  |
| <i>cruciata</i> (L.) | GBIF:5286308 |            |            | 11.942323 | E Haus                | Heise                 | Lunularia-cruciata-2- | Lunularia-cruciata-2- |
|                      |              |            |            |           |                       |                       | Lunularia-cruciata-3- | Lunularia-cruciata-3- |

---

## Reference

37. Peters, K.; Blatt-Janmaat, K.; Tkach, N.; Van Dam, N.M.; Neumann, S. Investigating untargeted metabolomics for its use in integrative taxonomy—Linking metabolomics, DNA marker-based se-quencing and bioimaging of phenotypes. *Zenodo* **2023**. <https://doi.org/10.5281/ZENODO.7638304>.
